# Supplementary material for: Egg toxic compounds in the animal kingdom. A comprehensive review
Source: Royal Society of Chemistry journal article supplement (doi:10.1039/d2np00029f), 2022-01-01
Supplement: d2np00029f1.pdf [file d2np00029f1.pdf]

## Egg toxic compounds in the animal kingdom. A comprehensive review.

Matías L. Giglio, Wilhelm Boland and Horacio Heras.

Table S1. Complete list of animal species with egg toxins

| Classification         | Species <sup>a</sup>                                       | Toxin(s)                                                                                 | Reference <sup>b</sup> |
|------------------------|------------------------------------------------------------|------------------------------------------------------------------------------------------|------------------------|
| <b>CNIDARIA</b>        |                                                            |                                                                                          |                        |
| <b>Anthozoa</b>        |                                                            |                                                                                          |                        |
| <b>Actiniaria</b>      |                                                            |                                                                                          |                        |
| Edwardsiidae           | <i>Nematostella vectensis</i> Stephenson, 1935             | NvePTx1, NEP3, NEP3-like, NEP4                                                           | 284                    |
| <b>Zoantharia</b>      |                                                            |                                                                                          |                        |
| Sphenopidae            | <i>Palythoa tuberculosa</i> (Esper, 1805)                  | Palytoxin                                                                                | 256                    |
| <b>PLATYHELMINTHES</b> |                                                            |                                                                                          |                        |
| <b>Rhabditophora</b>   |                                                            |                                                                                          |                        |
| <b>Polycladida</b>     |                                                            |                                                                                          |                        |
| Planoceridae           | <i>Planocera multitentaculata</i> Kato, 1944               | Tetrodotoxin                                                                             | 171                    |
| <b>Tricladida</b>      |                                                            |                                                                                          |                        |
| Geoplanidae            | <i>Bipalium adventitium</i> Hyman, 1943                    | Tetrodotoxin                                                                             | 172                    |
| <b>MOLLUSCA</b>        |                                                            |                                                                                          |                        |
| <b>Cephalopoda</b>     |                                                            |                                                                                          |                        |
| <b>Octopoda</b>        |                                                            |                                                                                          |                        |
| Octopodidae            | <i>Hapalochlaena lunulata</i> (Quoy & Gaimard, 1832)       | Tetrodotoxin                                                                             | 175                    |
|                        | <i>Hapalochlaena maculosa</i> (Hoyle, 1883)                | Tetrodotoxin                                                                             | 176                    |
| <b>Gastropoda</b>      |                                                            |                                                                                          |                        |
| <b>Mesogastropoda</b>  |                                                            |                                                                                          |                        |
| Ampullariidae          | <i>Pomacea canaliculata</i> (Lamarck, 1828)                | PcPV2                                                                                    | 36                     |
|                        | <i>Pomacea maculata</i> Perry, 1810                        | PmPV2                                                                                    | 35                     |
| Nudibranchia           | <i>Hexabranchnus sanguineus</i> (Rüppell & Leuckart, 1830) | Kabiramide A-F,<br>dihydrohalichondramide, 33-<br>dihydrohalichondramide, ulapaulide A-B | 239-241                |
| <b>Hexabranchnidae</b> |                                                            |                                                                                          |                        |
| <b>Neogastropoda</b>   |                                                            |                                                                                          |                        |
| Conidae                | <i>Conus victoriae</i> Reeve 1843                          | O-conotoxins, α-conotoxins                                                               | 33                     |
| <b>Pleurobranchida</b> |                                                            |                                                                                          |                        |
| Pleurobranchaeidae     | <i>Pleurobranchaea maculata</i> (Quoy & Gaimard, 1832)     | Tetrodotoxin                                                                             | 174                    |
| <b>Sacoglossa</b>      |                                                            |                                                                                          |                        |
| Plakobranchnidae       | <i>Elysia pusilla</i> (Bergh, 1871)                        | Halimedatetraacetate                                                                     | 71                     |
| <b>Umbraculida</b>     |                                                            |                                                                                          |                        |
| Tylodiniidae           | <i>Tylodina perversa</i> (Gmelin, 1791)                    | Isoxazoline alkaloids                                                                    | 156                    |
| <b>ARTHROPODA</b>      |                                                            |                                                                                          |                        |
| <b>Arachnida</b>       |                                                            |                                                                                          |                        |
| <b>Araneae</b>         |                                                            |                                                                                          |                        |
| Theridiidae            | <i>Latrodectus tredecimguttatus</i> (Rossi, 1790)          | Latroeggt toxin I-III                                                                    | 30-32                  |
| <b>Xiphosura</b>       |                                                            |                                                                                          |                        |
| Limulidae              | <i>Carcinoscorpius rotundicauda</i> (Latreille, 1802)      | Tetrodotoxin                                                                             | 173                    |
| <b>Crustacea</b>       |                                                            |                                                                                          |                        |
| <b>Decapoda</b>        |                                                            |                                                                                          |                        |
| Xanthidae              | <i>Lophozozymus pictor</i> (Fabricius, 1798)               | Palytoxin                                                                                | 258                    |
| <b>Insecta</b>         |                                                            |                                                                                          |                        |
| <b>Coleoptera</b>      |                                                            |                                                                                          |                        |

| Classification                                     | Species <sup>a</sup>                                   | Toxin(s)                                            | Reference <sup>b</sup> |
|----------------------------------------------------|--------------------------------------------------------|-----------------------------------------------------|------------------------|
| <b>Chrysomelidae</b>                               | <i>Acalymma vittatum</i> (Fabricius, 1775)             | Cucurbitacin D                                      | 61, 62                 |
|                                                    | <i>Chrysolina coerulans</i> (Scriba, 1791)             | Cardenolides                                        | 89                     |
|                                                    | <i>Chrysolina fuliginosa</i> (Olivier, 1807)           | Cardenolides                                        | 97                     |
|                                                    | <i>Chrysolina polita</i> (Linnaeus, 1758)              | Cardenolides                                        | 89                     |
|                                                    | <i>Chrysomela populi</i> Linnaeus, 1758                | Isoxazoline glycosides, Salicin                     | 198                    |
|                                                    | <i>Chrysomela saliceti</i> (Weise, 1884)               | Isoxazoline glycosides, Salicin                     | 198                    |
|                                                    | <i>Chrysomela tremulae</i> Fabricius, 1787             | Isoxazoline glycosides, Salicin                     | 198                    |
|                                                    | <i>Chrysomela vigintipunctata</i> (Scopoli, 1763)      | Isoxazoline glycosides, Salicin                     | 198                    |
|                                                    | <i>Diabrotica balteata</i> LeConte, 1865               | Cucurbitacin D                                      | 61, 62                 |
|                                                    | <i>Diabrotica undecimpunctata howardi</i> Barber, 1947 | Cucurbitacin D                                      | 61, 62                 |
|                                                    | <i>Galeruca tanacetii</i> (Linnaeus, 1758)             | Anthraquinones, Anthrones                           | 217                    |
|                                                    | <i>Galerucella californiensis</i> (Linnaeus, 1767)     | Anthraquinones, Anthrones                           | 215                    |
|                                                    | <i>Galerucella lineola</i> (Fabricius, 1781)           | Anthraquinones, Anthrones                           | 215                    |
|                                                    | <i>Galerucella nymphaeae</i> (Linnaeus, 1758)          | Anthraquinones, Anthrones                           | 215                    |
|                                                    | <i>Galerucella pusilla</i> (Duftschmid, 1825)          | Anthraquinones, Anthrones                           | 215                    |
|                                                    | <i>Galerucella tenella</i> (Linnaeus, 1761)            | Anthraquinones, Anthrones                           | 215                    |
|                                                    | <i>Gastrophysa viridula</i> (De Geer, 1775)            | Isoxazoline glycosides                              | 198                    |
|                                                    | <i>Lochmaea suturalis</i> (Thomson, 1866)              | Anthraquinones, Anthrones                           | 215                    |
|                                                    | <i>Oreina elongata</i> (Suffrian, 1851)                | Cardenolides, Pyrrolizidine alkaloids               | 90                     |
|                                                    | <i>Oreina luctuosa</i> (Olivier, 1807)                 | Cardenolides                                        | 90                     |
|                                                    | <i>Paropsis atomaria</i> Olivier, 1807                 | Prunasin, (R)-mandelonitrile                        | 73                     |
|                                                    | <i>Phratora laticollis</i> Suffrian, 1851              | Isoxazoline glycosides                              | 198                    |
|                                                    | <i>Phratora tibialis</i> (Suffrian, 1851)              | Isoxazoline glycosides                              | 198                    |
|                                                    | <i>Phratora vitellinae</i> (Linnaeus, 1758)            | Isoxazoline glycosides, Salicin                     | 198                    |
| <i>Plagioderma versicolora</i> (Laicharting, 1781) | Isoxazoline glycosides                                 | 198                                                 |                        |
| <i>Pyrrhalta viburni</i> (Paykull, 1799)           | Anthraquinones                                         | 91                                                  |                        |
| <i>Trirhabda geminata</i> Horn, 1893               | Anthraquinones                                         | 216                                                 |                        |
| <b>Coccinellidae</b>                               | <i>Adalia bipunctata</i> (Linnaeus, 1758)              | Homotropane alkaloids, Piperidine alkaloids         | 143                    |
|                                                    | <i>Coccinella septempunctata</i> (Linnaeus, 1758)      | Tricyclic alkaloids, Pyrrolizidine alkaloids        | 128, 142               |
|                                                    | <i>Epilachna paenulata</i> (Germar, 1824)              | Piperidine alkaloids                                | 141                    |
|                                                    | <i>Epilachna varivestis</i> Mulsant, 1850              | Alkaloids                                           | 140, 144               |
|                                                    | <i>Exochomus quadripustulatus</i> (Linnaeus, 1758)     | Tricyclic alkaloids                                 | 145                    |
|                                                    | <i>Harmonia axyridis</i> (Pallas, 1772)                | Aliphatic alkaloids                                 | 142                    |
|                                                    | <i>Hippodamia convergens</i> Guerin-Meneville, 1842    | Tricyclic alkaloids                                 | 142, 153               |
| <b>Derodontidae</b>                                | <i>Laricobius nigrinus</i> Fender, 1945                | Anthrones                                           | 218                    |
|                                                    | <i>Laricobius osakensis</i> Montgomery & Shiyake, 2011 | Anthrones                                           | 218                    |
| <b>Lampyridae</b>                                  | <i>Ellychnia corrusca</i> (Linnaeus, 1767)             | Lucibufagin                                         | 111                    |
|                                                    | <i>Photinus ignitus</i> Fall, 1927                     | Lucibufagin                                         | 110                    |
|                                                    | <i>Photinus marginellus</i> LeConte, 1852              | Lucibufagin                                         | 110                    |
|                                                    | <i>Photinus pyralis</i> (Linnaeus, 1767)               | Lucibufagin                                         | 113                    |
|                                                    | <i>Photuris versicolor</i> Fabricius, 1798             | Lucibufagin, N-methylquinolinum 2-carboxylate       | 109, 248               |
| <b>Meloidae</b>                                    | <i>Epicauta funebris</i> Horn 1873                     | Cantharidin                                         | 46                     |
|                                                    | <i>Hycleus lunatus</i> (Pallas, 1781)                  | Cantharidin                                         | 48                     |
|                                                    | <i>Hycleus scabiosae</i> (Olivier, 1811)               | Cantharidin, Palosin, Palosininmide, Cantharinamide | 264                    |
|                                                    | <i>Mylabris quadripunctata</i> (Linnaeus, 1767)        | Cantharidin                                         | 48                     |
| <b>Oedemeridae</b>                                 | <i>Nacerderes caudata</i> (Kono, 1936)                 | Cantharidin                                         | 50                     |
|                                                    | <i>Nacerderes katoi</i> (Kono, 1932)                   | Cantharidin                                         | 50                     |
|                                                    | <i>Nacerderes waterhousei</i> (Harold, 1875)           | Cantharidin                                         | 50                     |

| Classification         | Species <sup>a</sup>                                | Toxin(s)                        | Reference <sup>b</sup> |
|------------------------|-----------------------------------------------------|---------------------------------|------------------------|
|                        | <i>Oedemera femorata</i> (Scopoli, 1763)            | Cantharidin                     | 47, 52                 |
|                        | <i>Oedemera flavipes</i> (Fabricius, 1792)          | Cantharidin                     | 47                     |
| <b>Pyrochroidae</b>    | <i>Neopyrochroa flabellata</i> (Fabricius, 1787)    | Cantharidin                     | 53                     |
|                        | <i>Schizotus pectinicornis</i> (Linnaeus, 1758)     | Cantharidin                     | 52                     |
| <b>Staphylinidae</b>   | <i>Paederus fuscipes</i> Curtis, 1826               | Pederin                         | 229                    |
|                        | <i>Paederus riparius</i> (Linnaeus, 1758)           | Pederin                         | 232                    |
|                        | <i>Paederus sabaeus</i> Erichson, 1840              | Pederin                         | 227                    |
| <b>Diptera</b>         |                                                     |                                 |                        |
| <b>Ceratopogonidae</b> | <i>Atrichopogon trifasciatus</i> Kieffer, 1918      | Cantharidin                     | 47                     |
| <b>Tachinidae</b>      | <i>Archytas aterrimus</i> (Robineau-Desvoidy, 1830) | Pyrrrolizidine alkaloids        | 127                    |
|                        | <i>Chetogena claripennis</i> (Macquart, 1848)       | Pyrrrolizidine alkaloids        | 127                    |
|                        | <i>Lespesia aletiae</i> (Riley, 1879)               | Pyrrrolizidine alkaloids        | 127                    |
|                        | <i>Lespesia</i> sp.                                 | Pyrrrolizidine alkaloids        | 127                    |
| <b>Hemiptera</b>       |                                                     |                                 |                        |
| <b>Adelgidae</b>       | <i>Adelges tsugae</i> Annand, 1924                  | Anthraquinones, Anthrones       | 218                    |
| <b>Dactylopiidae</b>   | <i>Dactylopius confusus</i> (Cockerell, 1893)       | Anthraquinones                  | 219                    |
| <b>Lygaeidae</b>       | <i>Caenocoris nerii</i> (Germar, 1847)              | Cardenolides                    | 92                     |
|                        | <i>Oncopeltus fasciatus</i> (Dallas, 1852)          | Cardenolides                    | 93                     |
| <b>Hymenoptera</b>     |                                                     |                                 |                        |
| <b>Braconidae</b>      | <i>Cotesia zyaenarum</i> Marshall, 1885             | Cyanogens                       | 75                     |
|                        | <i>Heterogamus dispar</i> (Curtis, 1834)            | Cyanogens                       | 82                     |
| <b>Chalcididae</b>     | <i>Brachymeria ovata</i> (Say, 1824)                | Pyrrrolizidine alkaloids        | 127                    |
| <b>Eupelmidae</b>      | <i>Eupelmus atropurpureus</i> Dalman, 1820          | Cyanogens                       | 82                     |
|                        | <i>Eupelmus vesicularis</i> (Retzius, 1783)         | Cyanogens                       | 82                     |
| <b>Ichneumonidae</b>   | <i>Corsoncus</i> sp.                                | Pyrrrolizidine alkaloids        | 127                    |
|                        | <i>Gelis cursitans</i> (Fabricius, 1775)            | Cyanogens                       | 82                     |
|                        | <i>Itopectis viduata</i> (Gravenhorst, 1829)        | Cyanogens                       | 82                     |
|                        | <i>Listrognathus obnoxius</i> (Gravenhorst, 1829)   | Cyanogens                       | 82                     |
| <b>Lepidoptera</b>     |                                                     |                                 |                        |
| <b>Erebidae</b>        | <i>Arctia caja</i> (Linnaeus, 1758)                 | Cajin, Pyrrrolizidine alkaloids | 116, 123, 286          |
|                        | <i>Cosmosoma myrodora</i> (Dyar, 1907)              | Pyrrrolizidine alkaloids        | 121                    |
|                        | <i>Cretonotos transiens</i> Walker, 1855            | Pyrrrolizidine alkaloids        | 119, 122               |
|                        | <i>Hyalurga syma</i> Walker, 1854                   | Pyrrrolizidine alkaloids        | 117                    |
|                        | <i>Nyctemera annulata</i> (Boisduval, 1832)         | Pyrrrolizidine alkaloids        | 115                    |
|                        | <i>Tyria jacobaeae</i> (Linnaeus, 1758)             | Pyrrrolizidine alkaloids        | 120                    |
|                        | <i>Utetheisa ornatix</i> (Linnaeus, 1758)           | Pyrrrolizidine alkaloids        | 118                    |
| <b>Lycaenidae</b>      | <i>Eumaeus atala</i> (Poey, 1832)                   | Cycasin                         | 81                     |
| <b>Nymphalidae</b>     | <i>Actinote alalia</i> (Felder & Felder, 1860)      | Linamarin                       | 76                     |
|                        | <i>Actinote brylla</i> Oberthur, 1917               | Linamarin                       | 76                     |
|                        | <i>Actinote canutia</i> (Hopffer, 1874)             | Linamarin                       | 76                     |
|                        | <i>Actinote carycina</i> Jordan, 1913               | Linamarin                       | 76                     |
|                        | <i>Actinote genitrix</i> D'Almeida, 1922            | Linamarin                       | 76                     |
|                        | <i>Actinote hyalina</i> Jordan, 1913                | Linamarin                       | 76                     |
|                        | <i>Actinote mamita</i> (Burmeister, 1861)           | Linamarin                       | 76                     |
|                        | <i>Actinote parapheles</i> Jordan, 1913             | Linamarin                       | 76                     |
|                        | <i>Actinote pellenea</i> Hübner, 1821               | Linamarin                       | 76                     |
|                        | <i>Actinote pyrrrha</i> (Fabricius, 1775)           | Linamarin                       | 76                     |
|                        | <i>Actinote rhodope</i> D'Almeida, 1923             | Linamarin                       | 76                     |
|                        | <i>Actinote surima</i> (Schaus, 1902)               | Linamarin                       | 76                     |

| Classification            | Species <sup>a</sup>                                        | Toxin(s)                 | Reference <sup>b</sup> |
|---------------------------|-------------------------------------------------------------|--------------------------|------------------------|
|                           | <i>Aeria olena</i> Weymer, 1875                             | Pyrrrolizidine alkaloids | 124, 126               |
|                           | <i>Agraulis vanillae</i> (Linnaeus, 1758)                   | Linamarin, Lotaustralin  | 74                     |
|                           | <i>Altinote hylonome</i> Doubleday, 1844                    | Cyanogens                | 76                     |
|                           | <i>Cethosia penthesilea</i> (Cramer, 1777)                  | Linamarin, Lotaustralin  | 74                     |
|                           | <i>Danaus chrysippus</i> (Linnaeus, 1758)                   | Cardenolides             | 87                     |
|                           | <i>Danaus gilippus</i> (Cramer, 1775)                       | Pyrrrolizidine alkaloids | 124, 125               |
|                           | <i>Danaus plexippus</i> (Linnaeus, 1758)                    | Cardenolides             | 87                     |
|                           | <i>Dryas iulia</i> (Fabricius, 1775)                        | Linamarin, Lotaustralin  | 74                     |
|                           | <i>Heliconius charithonia</i> (Linnaeus, 1767)              | Cyanogens                | 78                     |
|                           | <i>Heliconius melpomene</i> (Linnaeus, 1758)                | Linamarin, Lotaustralin  | 77                     |
|                           | <i>Hypothyris euclea</i> (Godart, 1819)                     | Pyrrrolizidine alkaloids | 124                    |
|                           | <i>Ithomia agnosia</i> Hewitson, 1854                       | Pyrrrolizidine alkaloids | 124                    |
|                           | <i>Mechanitis lysimnia</i> (Fabricius, 1793)                | Pyrrrolizidine alkaloids | 124                    |
|                           | <i>Mechanitis polymnia</i> Linnaeus, 1758                   | Pyrrrolizidine alkaloids | 124, 126               |
|                           | <i>Methona themisto</i> Hübner, 1816                        | Pyrrrolizidine alkaloids | 124                    |
|                           | <i>Sais rosalia</i> Cramer, 1782                            | Pyrrrolizidine alkaloids | 124                    |
|                           | <i>Thyridia psidii</i> Linnaeus, 1758                       | Pyrrrolizidine alkaloids | 124                    |
|                           | <i>Tithorea harmonia</i> Cramer, 1779                       | Pyrrrolizidine alkaloids | 124, 126               |
| <b>Papilionidae</b>       | <i>Atrophaneura alcinous</i> (Klug, 1836)                   | Aristolochic acids       | 203                    |
|                           | <i>Battus philenor</i> (Linnaeus, 1771)                     | Aristolochic acids       | 208                    |
|                           | <i>Parnassius phoebus</i> (Fabricius, 1793)                 | Sarmentosin              | 79                     |
| <b>Pieridae</b>           | <i>Pieris brassicae</i> (Linnaeus, 1758)                    | Allyl isothiocyanate     | 251                    |
| <b>Zygaenidae</b>         | <i>Adscita geryon</i> (Hubner, 1813)                        | Cyanogens                | 75                     |
|                           | <i>Zygaena filipendulae</i> (Linnaeus, 1758)                | Linamarin, Lotaustralin  | 75, 78                 |
|                           | <i>Zygaena lavandulae</i> (Esper, 1783)                     | Lotaustralin             | 78                     |
|                           | <i>Zygaena lonicerae</i> (Scheven, 1777)                    | Cyanogens                | 75                     |
|                           | <i>Zygaena trifolii</i> (Esper, 1783)                       | Cyanogens                | 75                     |
| <b>Orthoptera</b>         |                                                             |                          |                        |
| <b>Pyrgomorphidae</b>     | <i>Poekilocerus bufonius</i> (Klug, 1832)                   | Cardenolides             | 95                     |
|                           | <i>Poekilocerus pictus</i> (Fabricius, 1775)                | Cardenolides             | 94                     |
| <b>CHORDATA</b>           |                                                             |                          |                        |
| <b>Petromyzonti</b>       |                                                             |                          |                        |
| <b>Petromyzontiformes</b> |                                                             |                          |                        |
| <b>Petromyzontidae</b>    | <i>Lethenteron camtschaticum</i> (Tilesius, 1811)           | Lamprey toxin            | 294                    |
| <b>Actinopterygii</b>     |                                                             |                          |                        |
| <b>Chaetodontiformes</b>  |                                                             |                          |                        |
| <b>Chaetodontidae</b>     | <i>Chaetodon capistratus</i> Linnaeus, 1758                 | Palytoxin                | 259                    |
|                           | <i>Chaetodon sedentarius</i> Poey, 1860                     | Palytoxin                | 259                    |
| <b>Cyprinodontiformes</b> |                                                             |                          |                        |
| <b>Fundulidae</b>         | <i>Fundulus heteroclitus</i> (Linnaeus, 1766)               | Dinogunellin             | 274                    |
| <b>Gobiiformes</b>        |                                                             |                          |                        |
| <b>Gobiidae</b>           | <i>Acanthogobius flavimanus</i> (Temminck & Schlegel, 1845) | Tetrodotoxin             | 12                     |
|                           | <i>Gillichthys mirabilis</i> Cooper, 1864                   | Tetrodotoxin             | 12                     |
| <b>Perciformes</b>        |                                                             |                          |                        |
| <b>Stichaeidae</b>        | <i>Stichaeus grigorjewi</i> Herzenstein, 1890               | Dinogunellin             | 270, 271               |
|                           | <i>Stichaeus nozawae</i> Jordan & Snyder, 1902              | Dinogunellin             | 274                    |
| <b>Sphyraenidae</b>       | <i>Sphyraena</i> sp.                                        | Ciguatoxin               | 246                    |
| <b>Scorpaeniformes</b>    |                                                             |                          |                        |
| <b>Cottidae</b>           | <i>Scorpaenichthys marmoratus</i> (Ayres, 1854)             | Dinogunellin             | 270                    |

| Classification                                           | Species <sup>a</sup>                                        | Toxin(s)                                                     | Reference <sup>b</sup> |
|----------------------------------------------------------|-------------------------------------------------------------|--------------------------------------------------------------|------------------------|
| <b>Tetraodontiformes</b>                                 |                                                             |                                                              |                        |
| <b>Diodontidae</b>                                       | <i>Chylomycteris</i> sp.                                    | Tetrodotoxin                                                 | 12                     |
|                                                          | <i>Diodon hystrix</i> Linnaeus, 1758                        | Tetrodotoxin                                                 | 12                     |
| <b>Tetraodontidae</b>                                    | <i>Arothron hispidus</i> (Linnaeus, 1758)                   | Tetrodotoxin                                                 | 12                     |
|                                                          | <i>Arothron meleagris</i> (Lacepede, 1798)                  | Tetrodotoxin                                                 | 12                     |
|                                                          | <i>Canthigaster rivulata</i> (Temminck & Schlegel, 1850)    | Tetrodotoxin                                                 | 12                     |
|                                                          | <i>Chelonodon patoca</i> (Hamilton, 1822)                   | Tetrodotoxin                                                 | 177                    |
|                                                          | <i>Chonerhinos naritus</i> (Richardson, 1848)               | Saxitoxin, Tetrodotoxin                                      | 191                    |
|                                                          | <i>Lagocephalus sceleratus</i> (Gmelin, 1789)               | Tetrodotoxin                                                 | 12                     |
|                                                          | <i>Pao leiurus</i> (Bleeker, 1850)                          | Saxitoxin                                                    | 192                    |
|                                                          | <i>Pao suvattii</i> (Sontirat & Soonthornsatit, 1985)       | Saxitoxin                                                    | 192                    |
|                                                          | <i>Spherooides annulatus</i> (Jenyns, 1842)                 | Tetrodotoxin                                                 | 12                     |
|                                                          | <i>Spherooides maculatus</i> (Bloch & Schneider, 1801)      | Tetrodotoxin                                                 | 12                     |
|                                                          | <i>Spherooides testudineus</i> (Linnaeus, 1758)             | Tetrodotoxin                                                 | 12                     |
|                                                          | <i>Takifugu basilevskianus</i> (Basilevsky, 1855)           | Tetrodotoxin                                                 | 12                     |
|                                                          | <i>Takifugu chrysops</i> (Hilgendorf, 1879)                 | Tetrodotoxin                                                 | 12                     |
|                                                          | <i>Takifugu niphobles</i> (Jordan & Snyder, 1901)           | Tetrodotoxin                                                 | 12                     |
|                                                          | <i>Takifugu obscurus</i> (Abe, 1949)                        | Tetrodotoxin                                                 | 2                      |
|                                                          | <i>Takifugu ocellatus</i> (Linnaeus, 1758)                  | Tetrodotoxin                                                 | 12                     |
|                                                          | <i>Takifugu pardalis</i> (Temminck & Schlegel, 1850)        | Tetrodotoxin                                                 | 2, 12                  |
|                                                          | <i>Takifugu poecilonotus</i> (Temminck & Schlegel, 1850)    | Tetrodotoxin                                                 | 12                     |
| <i>Takifugu pseudommus</i> (Chu, 1935)                   | Tetrodotoxin                                                | 12                                                           |                        |
| <i>Takifugu rubripes</i> (Temminck & Schlegel, 1850)     | Tetrodotoxin                                                | 2, 12                                                        |                        |
| <i>Takifugu stictionotus</i> (Temminck & Schlegel, 1850) | Tetrodotoxin                                                | 12                                                           |                        |
| <i>Takifugu vermicularis</i> (Temminck & Schlegel, 1850) | Tetrodotoxin                                                | 2, 12, 177                                                   |                        |
| <i>Takifugu xanthopterus</i> (Temminck & Schlegel, 1850) | Tetrodotoxin                                                | 12                                                           |                        |
| <b>Amphibia</b>                                          |                                                             |                                                              |                        |
| <b>Anura</b>                                             |                                                             |                                                              |                        |
| <b>Bufo</b>                                              | <i>Anaxyrus americanus</i> (Holbrook, 1836)                 | Bufadienolides                                               | 104                    |
|                                                          | <i>Anaxyrus fowleri</i> (Hinckley, 1882)                    | Bufadienolides                                               | 104                    |
|                                                          | <i>Atelopus chiriquiensis</i> Shreve, 1936                  | Tetrodotoxin                                                 | 178                    |
|                                                          | <i>Bufo gargarizans</i> Cantor, 1842                        | Bufadienolides                                               | 105                    |
|                                                          | <i>Melanophryniscus simplex</i> Caramaschi and Cruz 2002    | Pyrrolizidine alkaloids, Pumiliotoxins, Piperidine alkaloids | 147                    |
|                                                          | <i>Rhinella marina</i> (Linnaeus, 1758)                     | Bufadienolides                                               | 41, 103                |
| <b>Dendrobatidae</b>                                     | <i>Oophaga pumilio</i> (Schmidt, 1857)                      | Alkaloids                                                    | 161                    |
|                                                          | <i>Phyllobates terribilis</i> Myers, Daly & Malkin, 1978    | Batrachotoxin, Homobatrachotoxin                             | 160                    |
| <b>Caudata</b>                                           |                                                             |                                                              |                        |
| <b>Salamandridae</b>                                     | <i>Cynops pyrrhogaster</i> (Boie, 1826)                     | Tetrodotoxin                                                 | 179                    |
|                                                          | <i>Notophthalmus viridescens</i> (Rafinesque, 1820)         | Tetrodotoxin                                                 | 182                    |
|                                                          | <i>Paramesotriton hongkongensis</i> (Myers & Leviton, 1962) | Tetrodotoxin                                                 | 182                    |
|                                                          | <i>Taricha granulosa</i> (Skilton, 1849)                    | Tetrodotoxin                                                 | 182                    |
|                                                          | <i>Taricha rivularis</i> (Twitty, 1935)                     | Tetrodotoxin                                                 | 181                    |
|                                                          | <i>Taricha torosa</i> (Rathke, 1833)                        | Tetrodotoxin                                                 | 180                    |
| <b>Lepidosauria</b>                                      |                                                             |                                                              |                        |
| <b>Squamata</b>                                          |                                                             |                                                              |                        |
| <b>Colubridae</b>                                        | <i>Rhabdophis tigrinus</i> (Boie, 1826)                     | Bufadienolides                                               | 106                    |

<sup>a</sup> Colors indicate the species' environment; **Black**: land; **Red**: freshwater; **Blue**: marine. <sup>b</sup>Reference numbers refer to article reference list.
